# Supplementary material for: In situ gelling and dissolvable hydrogels for use as on-demand wound dressings for burns
Source: Royal Society of Chemistry journal article supplement (doi:10.1039/d1bm00711d), 2021-01-01
Supplement: d1bm00711d1.pdf [file d1bm00711d1.pdf]

## *In Situ* Gelling and Dissolvable Hydrogels for Use as On-Demand Wound Dressings for Burns

Katherine A. Cook<sup>1</sup>, Nada Naguib<sup>1</sup>, Jack Kirsch<sup>1</sup>, Katherine Hohl<sup>1</sup>, Aaron H. Colby<sup>1</sup>, Robert Sheridan,<sup>3</sup> Edward K. Rodriguez<sup>2</sup>, Ara Nazarian<sup>2</sup>, and Mark W. Grinstaff<sup>1</sup>

<sup>1</sup>Departments of Chemistry, Biomedical Engineering, and Medicine, Boston University, Boston, MA 02215.

<sup>2</sup>Department of Surgery, Beth Israel Deaconess Medical Center, Boston, MA 02215

<sup>3</sup>Shriners Hospitals for Children and Burns Service, Department of Surgery, Massachusetts General Hospital, Boston, MA, USA, 02214

\*Correspondence to: [mgrin@bu.edu](mailto:mgrin@bu.edu)

### Supplemental Information:

|      |                                                                  |         |
|------|------------------------------------------------------------------|---------|
| I.   | Synthesis and characterization of compounds                      | Page 2  |
| II.  | NMR spectra of crosslinkers <b>5</b> , <b>6</b> , and <b>7</b>   | Page 3  |
| III. | MALDI spectra of crosslinkers <b>5</b> , <b>6</b> , and <b>7</b> | Page 9  |
| IV.  | Kinetics studies of crosslinker reactions                        | Page 11 |
| V.   | Rheology, swelling, and dissolution of hydrogels                 | Page 13 |
| VI.  | <i>In vivo</i> porcine study                                     | Page 15 |

## I. Synthesis and characterization of compounds

*PEG Diacid.* The synthesis of the PEG diacid compound was based on a previously reported protocol.<sup>14</sup> <sup>1</sup>H and <sup>13</sup>C NMR spectra were similar to the literature.<sup>14</sup>

**<sup>1</sup>H NMR (500MHz), CDCl<sub>3</sub>:** δ 1.93 (q, *J* = 7.21 Hz, 4H), 2.4 (tt, *J* = 7.21, 8H), 3.62 (m, 292H), 4.22 (tt, *J* = 4.73 Hz, 4H) ppm; **<sup>13</sup>C NMR (500 MHz), CDCl<sub>3</sub>:** 175.3, 172.8, 70.6, 68.9, 63.4, 33.1, 32.6, 19.9 ppm.

*Compound 1.* The synthesis of the starting material was based on a previously reported protocol.<sup>14</sup> <sup>1</sup>H and <sup>13</sup>C NMR spectra were similar to the literature.<sup>14</sup>

**<sup>1</sup>H NMR (500MHz), CDCl<sub>3</sub>:** δ 4.15 (tt, *J* = 3.3, 1.5, 4H), 3.54 (m, 296H), 2.8 (b, 8H), 2.6 (t, *J* = 7.3, 4H), 2.4 (t, *J* = 7.3, 4H), 2.0 (q, *J* = 7.3, 4H) ppm; **<sup>13</sup>C NMR (500 MHz), CDCl<sub>3</sub>:** 172.3, 169.0, 168.0, 70.5, 69.0, 63.6, 32.4, 29.9, 25.5, 19.7 ppm

*Compound 2.* The synthesis of compound **2** was based off of a previously reported protocol.<sup>13,16</sup>

**<sup>1</sup>H NMR (500MHz), CDCl<sub>3</sub>:** δ 4.21 (m, *J* = 4.6, 4.9, 4H), 3.62 (m, 296H), 2.68 (t, *J* = 7.3, 4H), 2.40 (t, *J* = 7.2, 4H), 1.98 (t, *J* = 7.2, 4H) ppm; **<sup>13</sup>C NMR (500 MHz), CDCl<sub>3</sub>:** 196.8, 172.6, 169.8, 70.6, 69.0, 63.6, 42.3, 32.8, 31.0, 20.5 ppm;

*Compound 3.* In a flame dried flask, 1,8-Diazabicyclo(5.4.0)undec-7-ene (265μL) and 6-mercaptohexanoic acid (122μL) were added to a solution of **1** (1g) in anhydrous DMF (5mL). The solution was stirred at room temperature for 16 hours. The organic phase was extracted with a 1M HCl solution, water, and brine. The organic phase was dried over sodium sulfate, filtered, and precipitated in diethyl ether. The precipitate was filtered and dried under vacuum to afford compound **3** as a white solid (96% yield).

**<sup>1</sup>H NMR (500MHz), CDCl<sub>3</sub>:** δ 4.22 (t, *J* = 4.8, 4H), 3.63 (m, 308H), 2.86 (t, *J* = 7.2, 4H), 2.61 (t, *J* = 7.3, 4H), 2.38 (t, *J* = 7.4, 4H), 2.30 (t, *J* = 7.4, 4H), 1.97 (t, *J* = 7.3, 4H), 1.60 (m, 8H), 1.39 (m, 4H), ppm; **<sup>13</sup>C NMR (500 MHz), CDCl<sub>3</sub>:** 198.6, 176.1, 172.7, 70.7, 69.0, 42.8, 33.5, 32.9, 29.2, 28.5, 28.1, 24.2, 20.6 ppm;

*Compound 4.* Synthesis of compound **4** follows the above procedure using 11-mercaptoundecanoic acid (0.190g) as the thiol source (92% yield).

**<sup>1</sup>H NMR (500MHz), CDCl<sub>3</sub>:** δ 4.22 (t, *J* = 4.9, 4H), 2.85 (t, *J* = 7.4, 7.3, 4H), 2.60 (t, *J* = 7.3, 4H), 2.38 (t, *J* = 7.3, 4H), 2.30 (t, *J* = 7.5, 4H), 1.97 (t, *J* = 7.3, 4H), 1.60 (m, 8H), 1.39 (m, 24H) ppm; **<sup>13</sup>C NMR (500 MHz), CDCl<sub>3</sub>:** 198.7, 176.5, 172.7, 70.5, 69.0, 63.5, 33.8, 32.9, 29.4, 29.3, 29.2, 29.1, 29.0, 28.95, 28.8, 28.7, 24.7, 20.6 ppm;

*Compound 5, 6 and 7.* The synthesis of compounds **5**, **6** and **7** are based off of a previously reported protocol (yield 96-98%).<sup>13,16</sup> The HNMR and CNMR spectra are similar to those previously reported.

*Compound 5:*

**<sup>1</sup>H NMR (500MHz), CDCl<sub>3</sub>:** δ 4.16 (t, *J* = 4.3, 4H), 3.92 (s, 4H), 3.57 (m, 257H), 2.78 (b, 8H), 2.67 (t, *J* = 7.3, 4H), 2.34 (t, *J* = 7.3, 4H), 1.95 (q, *J* = 7.3, 4H) ppm;

**<sup>13</sup>C NMR (500 MHz), CDCl<sub>3</sub>:** δ ppm;

**MALDI-TOF (pos): M<sub>w</sub>:** 3763 m/z

**GPC: M<sub>n</sub>:** 5077; **M<sub>w</sub>:** 5312; **PDI:** 1.05;

**Mp (DSC):** 46.06°C

*Compound 6:*

**<sup>1</sup>H NMR (500MHz), CDCl<sub>3</sub>:** δ 4.21 (tt, *J* = 1.5, 3.4, 4H), 3.63 (m, 290H), 2.86 (t, *J* = 7.3, 4H), 2.81 (b, 8H), 2.60 (tt, *J* = 2.5, 4.9, 8H), 2.37 (t, *J* = 7.3, 4H), 1.96 (q, *J* = 7.3, 7.4, 4H), 1.74 (q, *J* = 7.4, 7.7, 4H), 1.59 (m, 4H), 1.46 (m, 4H) ppm;

**<sup>13</sup>C NMR (500 MHz), CDCl<sub>3</sub>:** δ 198.6, 172.7, 169.1, 168.4, 70.5, 69.1, 63.6, 42.9, 33.0, 29.1, 28.4, 27.8, 25.6, 24.1, 20.6 ppm;

**MALDI-TOF (pos):** M<sub>w</sub>: 3807 m/z

**GPC:** M<sub>n</sub>: 4999; M<sub>w</sub>: 5196; PDI: 1.04;

**Mp (DSC):** 45.80°C

*Compound 7:*

**<sup>1</sup>H NMR (500MHz), CDCl<sub>3</sub>:** δ 4.22 (m, 4H), 3.62 (m, 278H), 2.85 (m, 8H), 2.70 (t, *J* = 7.2, 7.3, 2H), 2.60 (tt, *J* = 7.3, 4H), 2.45 (t, *J* = 7.2, 7.4, 4H), 2.37 (t, *J* = 7.2, 7.3, 4H), 2.04 (q, *J* = 7.2, 7.4, 4H), 1.95 (m, 4H), 1.71 (m, 2H), 1.52 (m, 4H), 1.25 (m, 10H) ppm;

**<sup>13</sup>C NMR (500 MHz), CDCl<sub>3</sub>:** δ 198.8, 172.7, 169.2, 168.6, 70.5, 69.0, 63.5, 42.8, 32.9, 30.9, 29.5, 29.3, 29.2, 29.0, 28.8, 28.7, 25.6, 24.5, 20.6 ppm;

**MALDI-TOF (pos):** M<sub>w</sub>: 4210 m/z

**GPC:** M<sub>n</sub>: 6038; M<sub>w</sub>: 6313; PDI: 1.05;

**Mp (DSC):** 47.42°C

## I. NMR spectra of crosslinkers

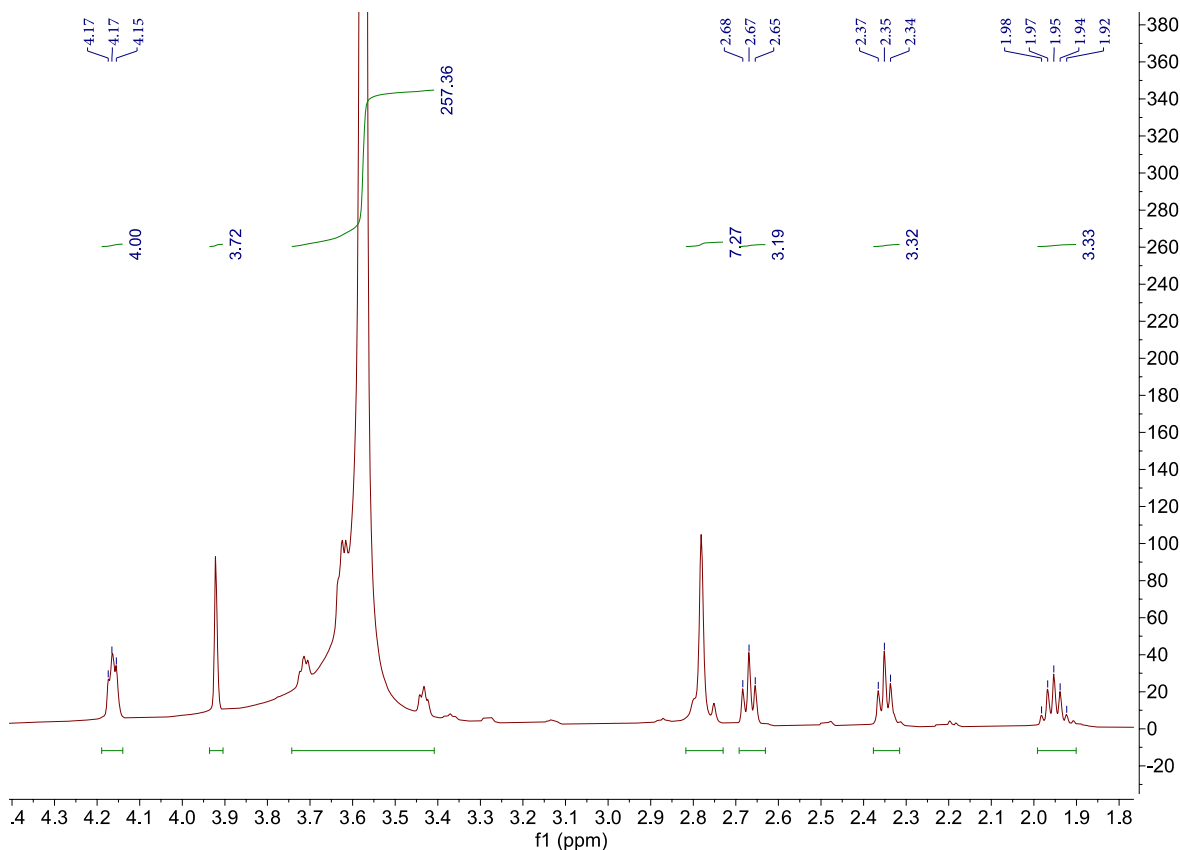

**Figure S1.** Representative <sup>1</sup>H NMR spectrum of crosslinker 5

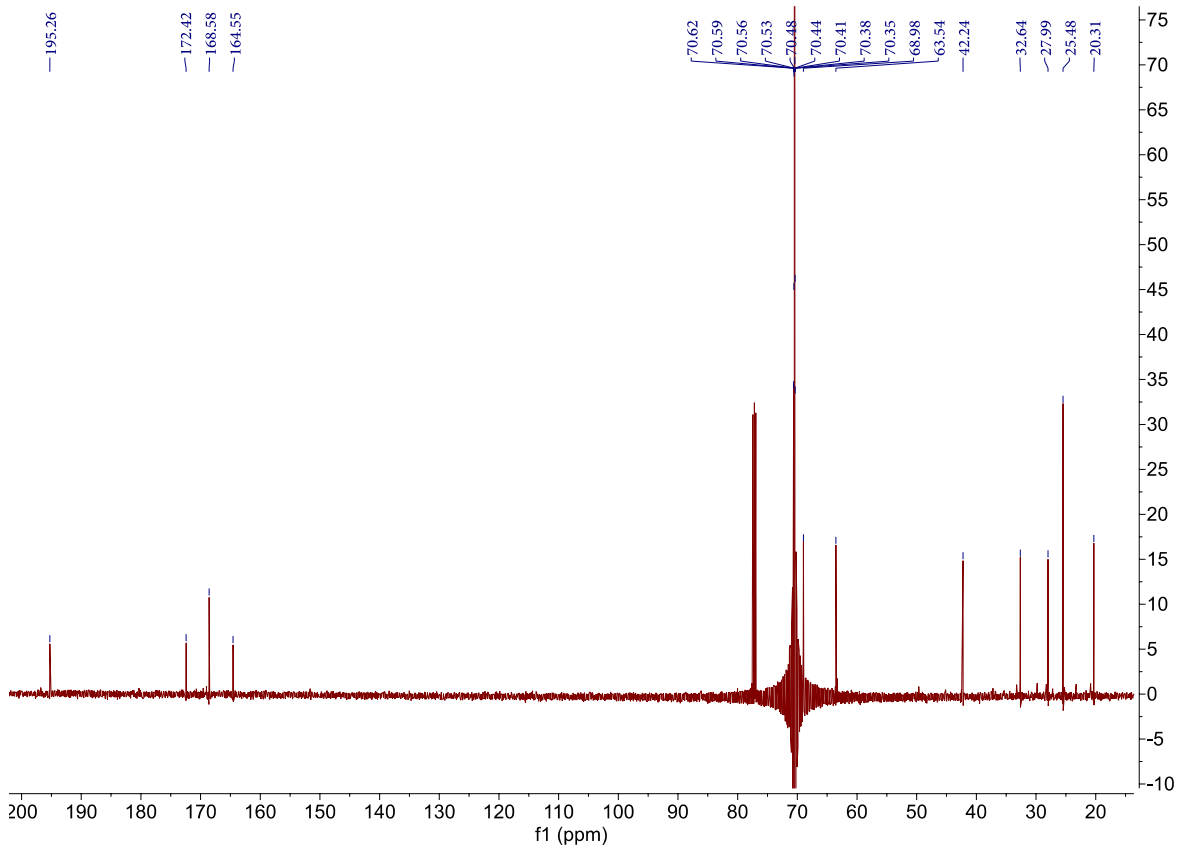

**Figure S2.** Representative  $^{13}\text{C}$  NMR spectrum of crosslinker **5**

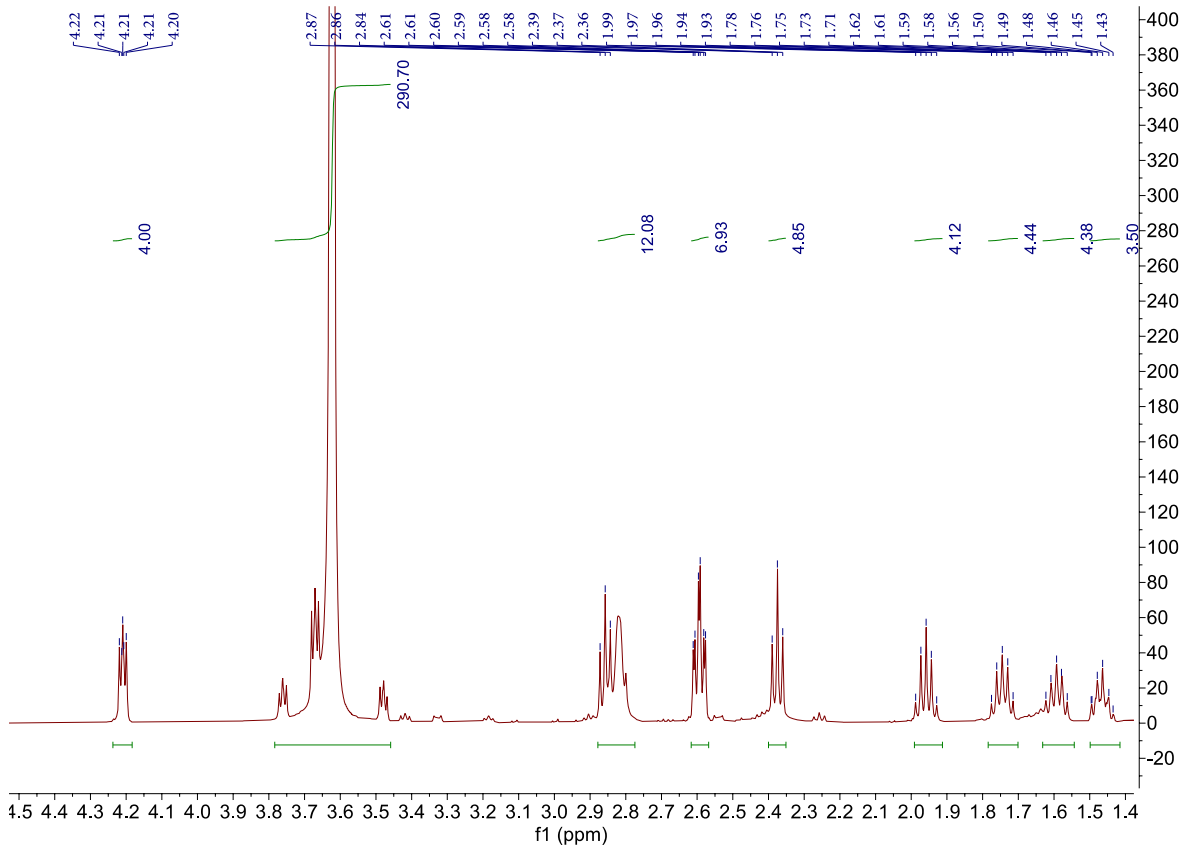

**Figure S3.** Representative  $^1\text{H}$  NMR spectrum of crosslinker **6**

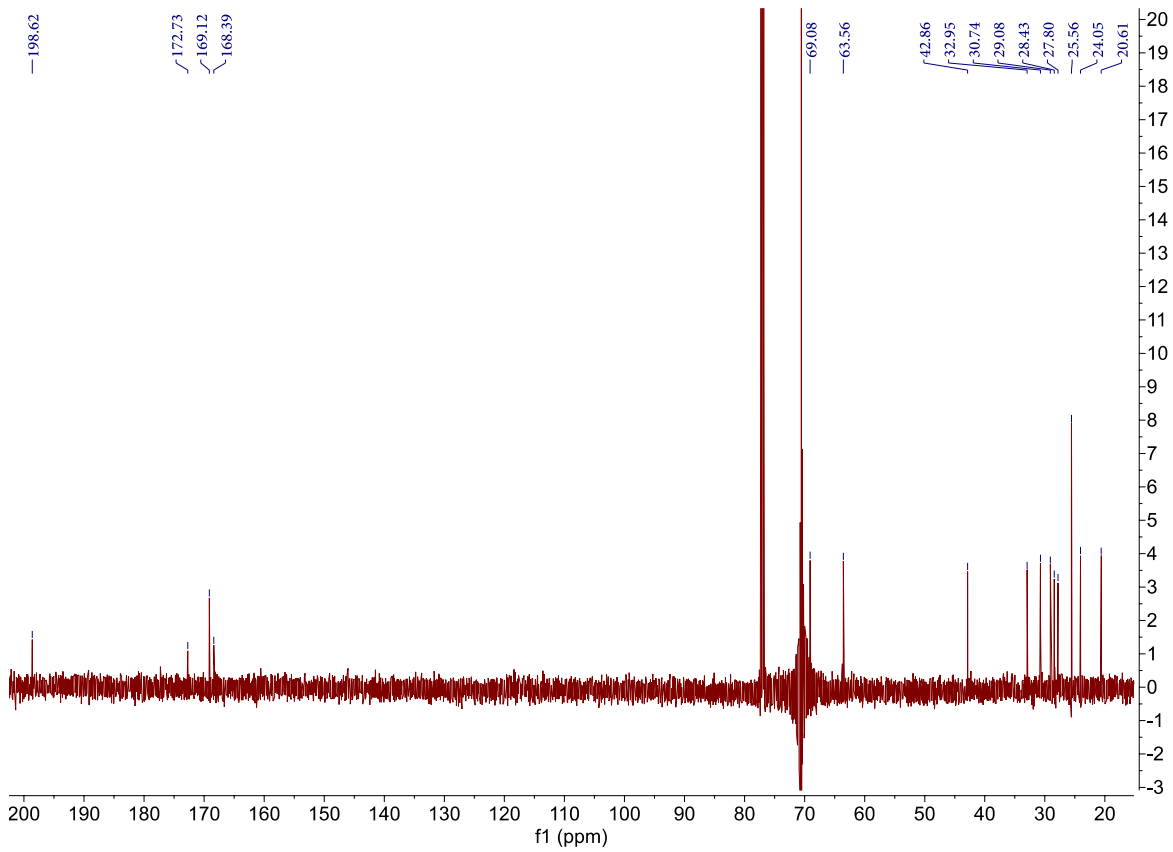

**Figure S4.** Representative  $^{13}\text{C}$  NMR spectrum of crosslinker **6**

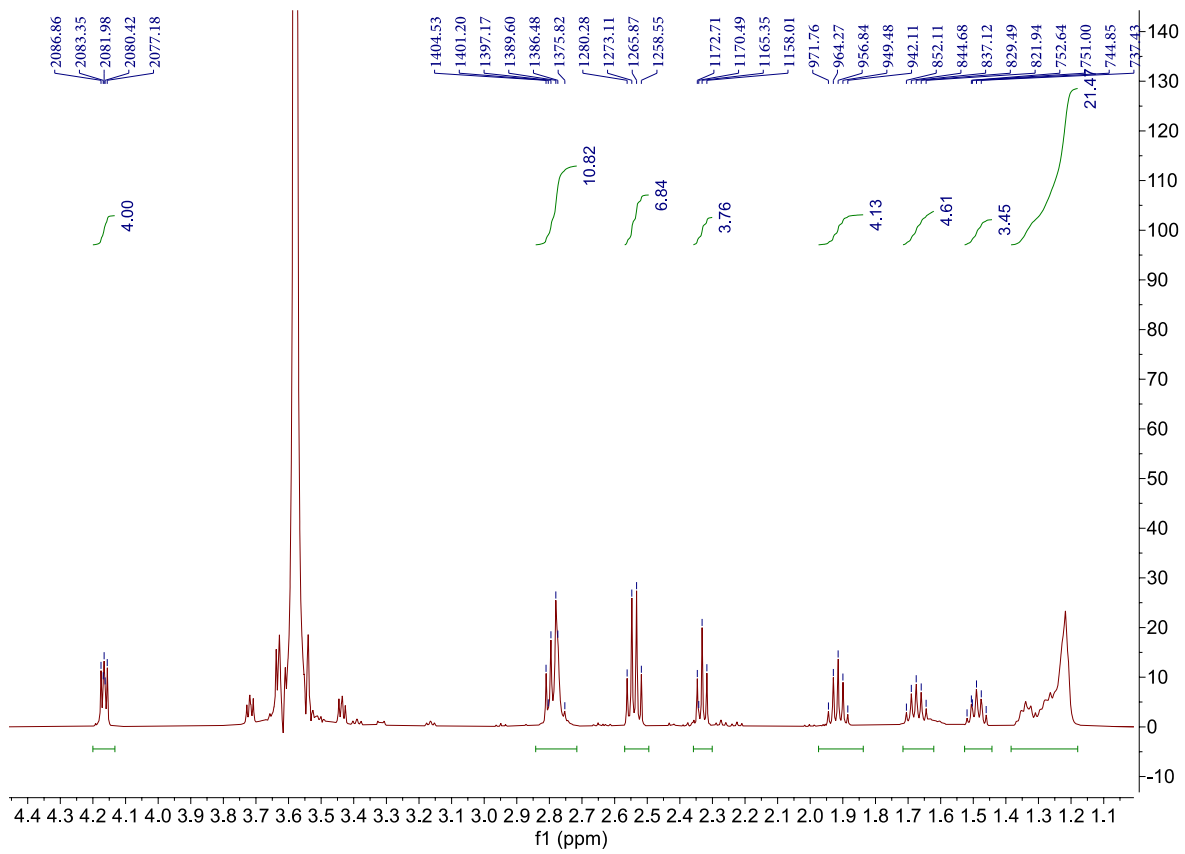

**Figure S5.** Representative  $^1\text{H}$  NMR spectrum of crosslinker **7**

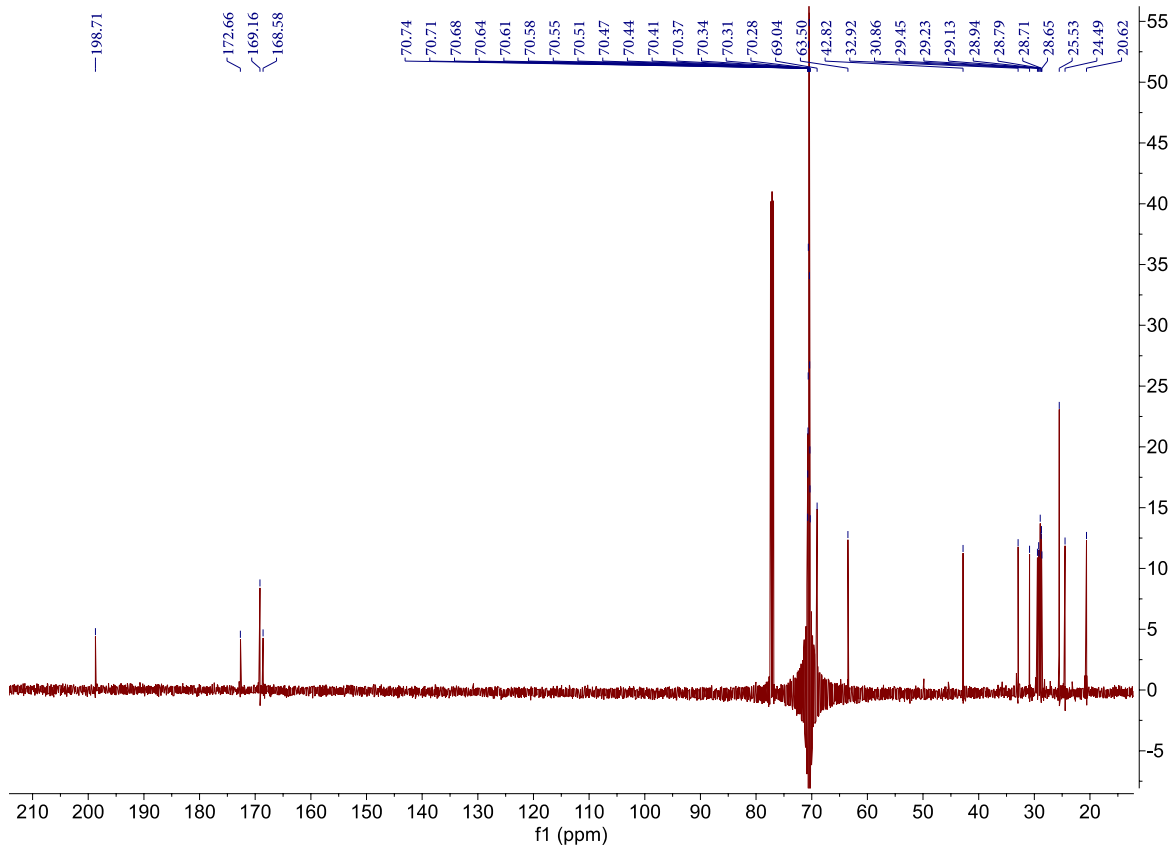

**Figure S6.** Representative <sup>13</sup>C NMR spectrum of crosslinker 7



## II. MALDI spectra

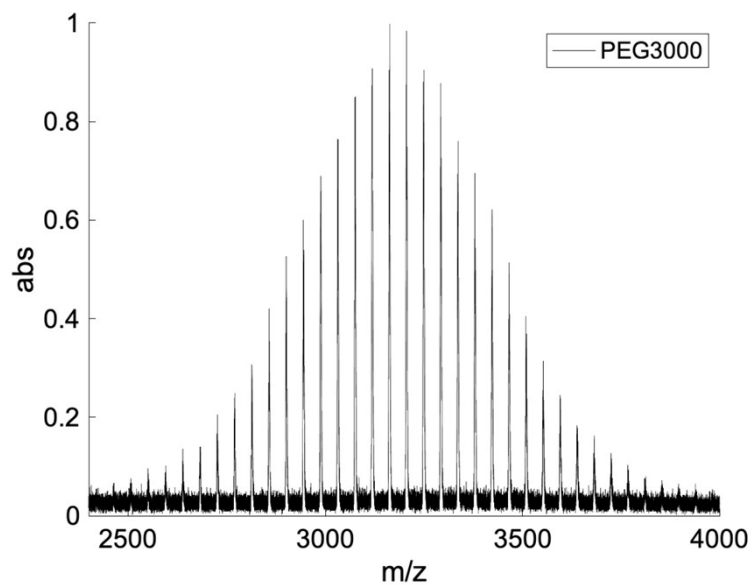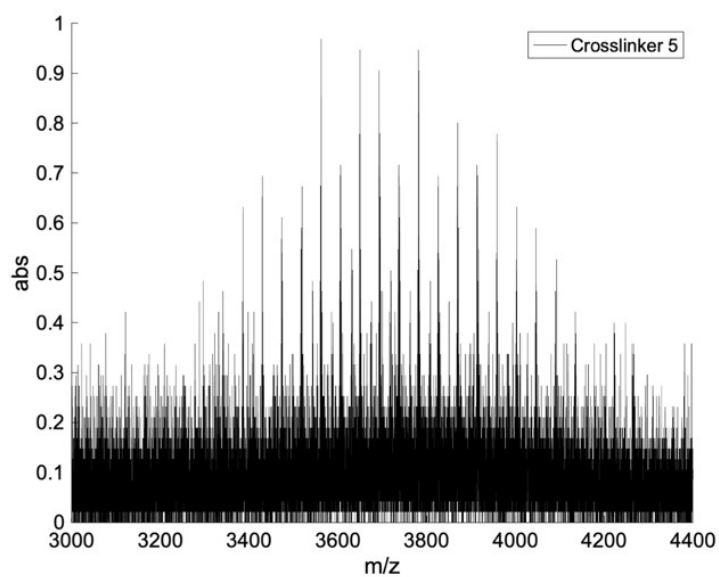

**Figure S7.** Representative MALDI spectrum of PEG starting material, 3000Da (top) crosslinker **5** (bottom)

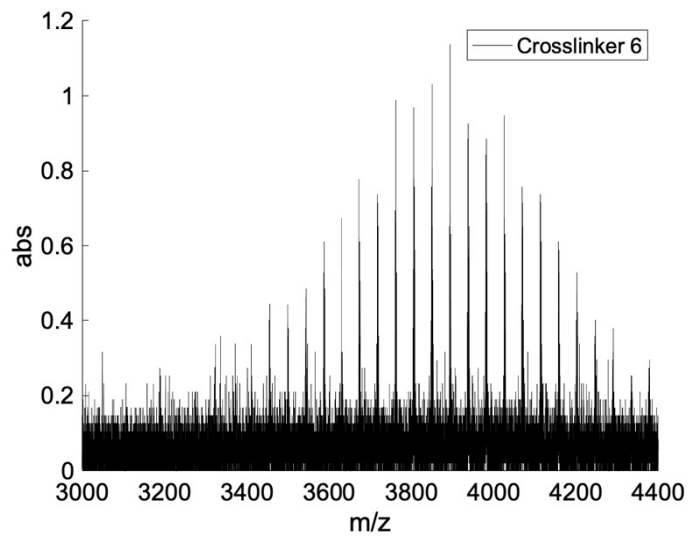

**Figure S8.** Representative MALDI spectrum of crosslinker 6

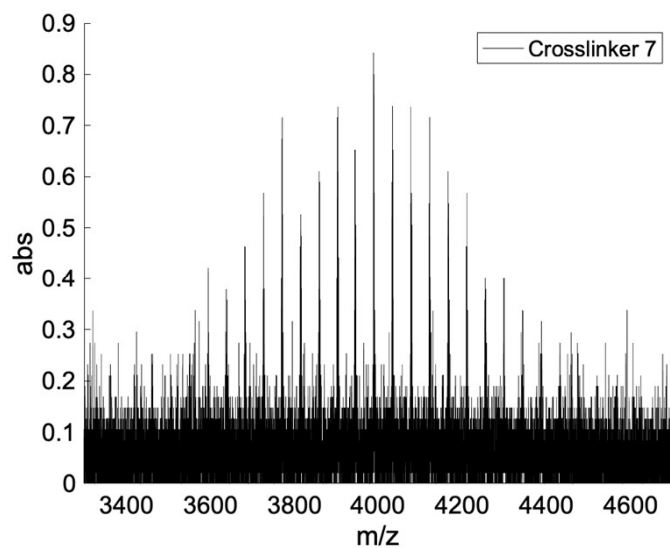

**Figure S9.** Representative MALDI spectrum of crosslinker 7

### III. Kinetics data

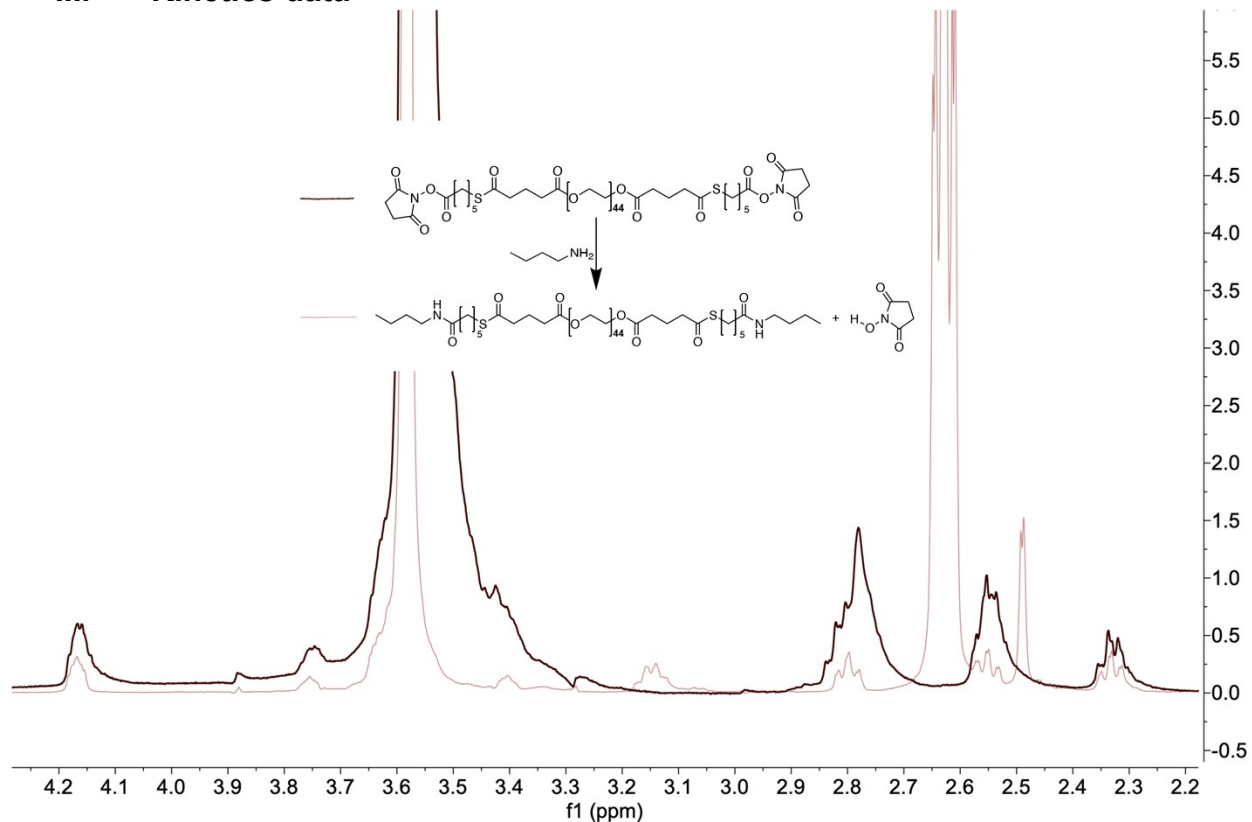

**Figure S10.** Representative <sup>1</sup>H NMR spectrum of crosslinker **6** before (red bold) and after (red narrow) reaction with PEI mimetic, *N*-butylamine. We observe a shift in the NHS peak that is conjugated to crosslinker **6** at 2.78ppm (red bold) to 2.49ppm (red) after the NHS ester is cleaved from crosslinker **6** when reacted with *N*-butylamine.

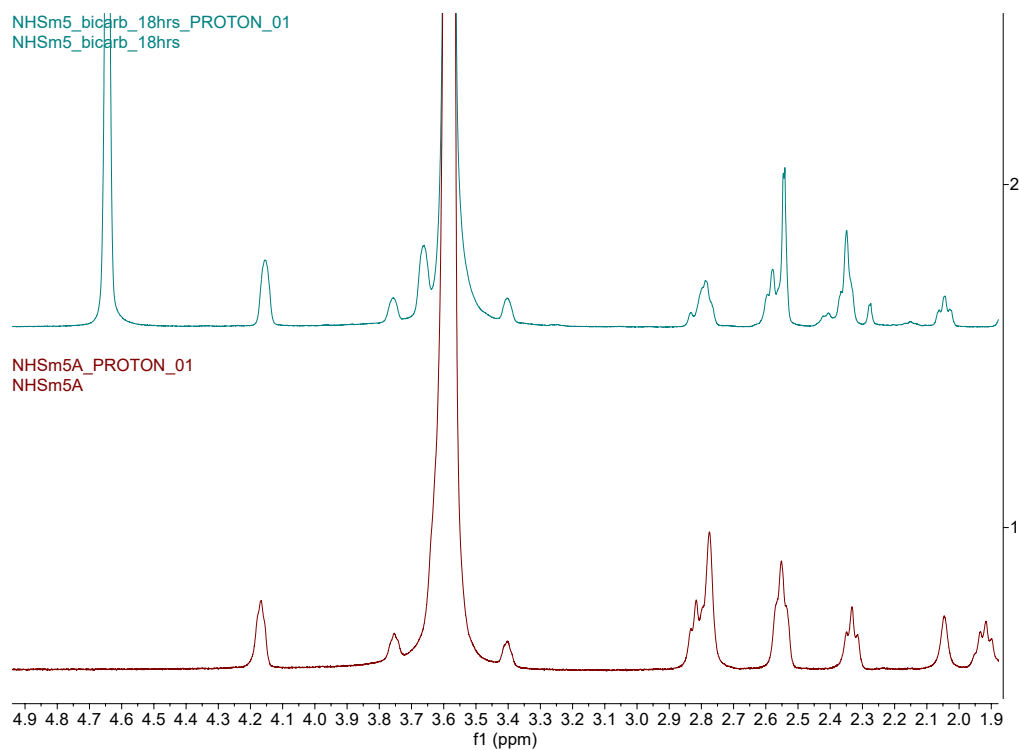

**Figure S11.** Representative  $^1\text{H}$  NMR spectrum of intact crosslinker **6** (bottom) (NHS at 2.78ppm), and NHS-hydrolyzed (2.54ppm) crosslinker **6** in 0.3M sodium bicarbonate buffer, pH 8.0 (top).

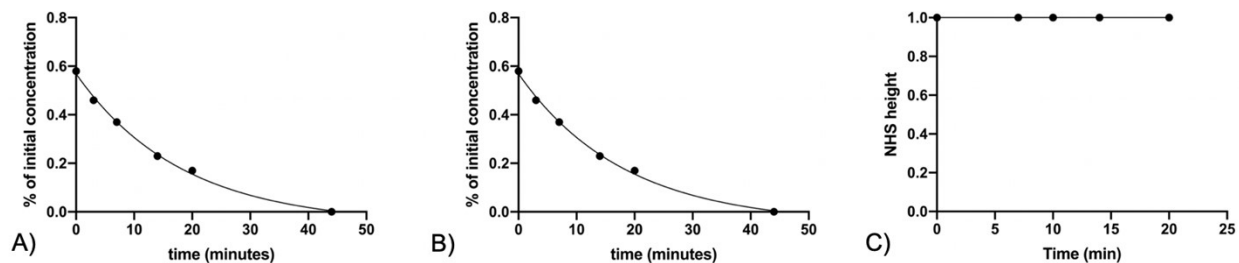

**Figure S12.** Rate order of A) thioester hydrolysis in crosslinker **5** in 0.3M Borate buffer, pH 8.0, B) thioester hydrolysis in crosslinker **6** in 0.3M Borate buffer, pH 8.0, C) **NHS** ester stability in 0.1M phosphate buffer pH 6.5.

#### IV. Rheology, swelling, and dissolution of hydrogels

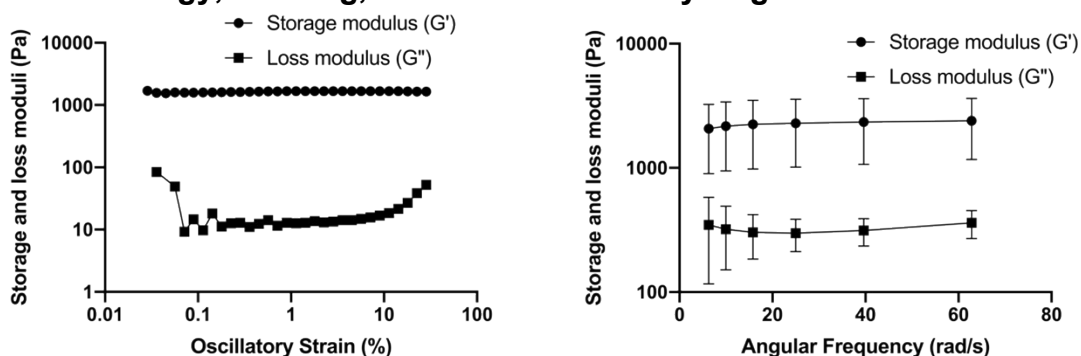

Figure S13. Strain sweep (left) and frequency sweep (right) of hydrogel 6.

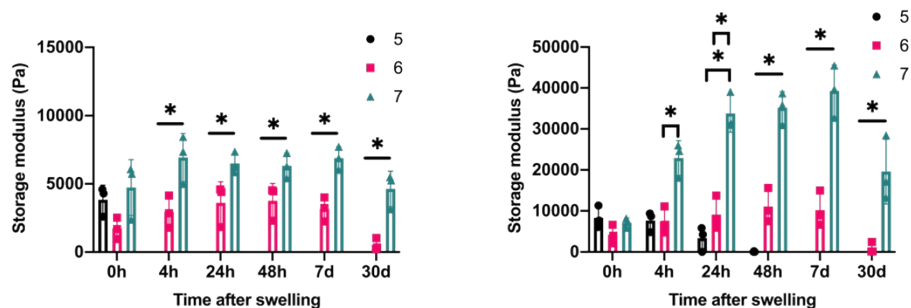

Figure S14. Storage modulus of hydrogels composed of crosslinkers 5, 6, and 7 and 10 wt% (left) and 20 wt% (right)

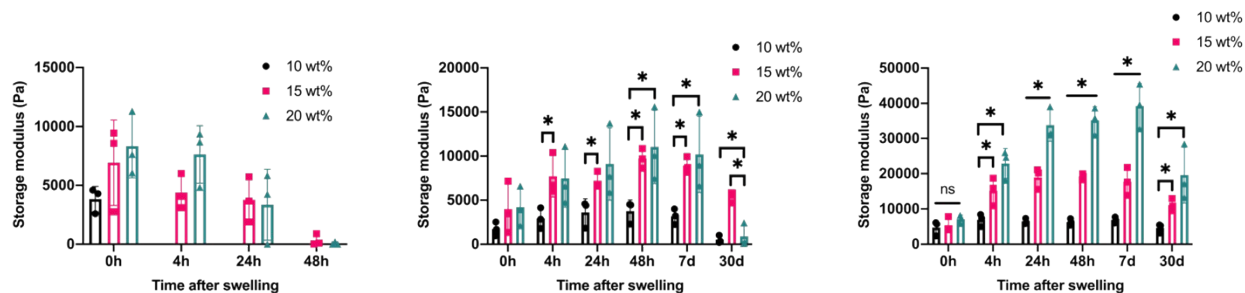

Figure S15. Storage modulus for crosslinkers 5 (left), 6 (middle), and 7 (right) at 10, 15, and 20 wt% over 30 days of swelling or until dissolution.

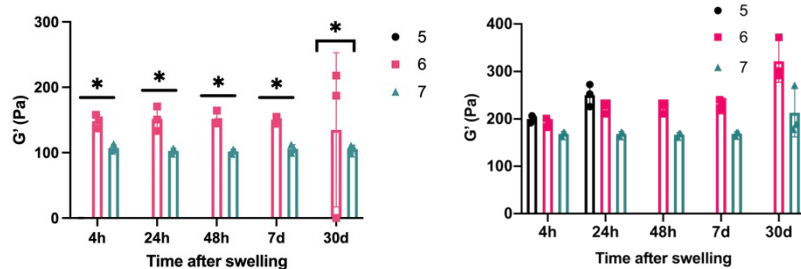

**Figure S16.** Swelling of hydrogels at 10 wt% (left) and 20 wt% (right).

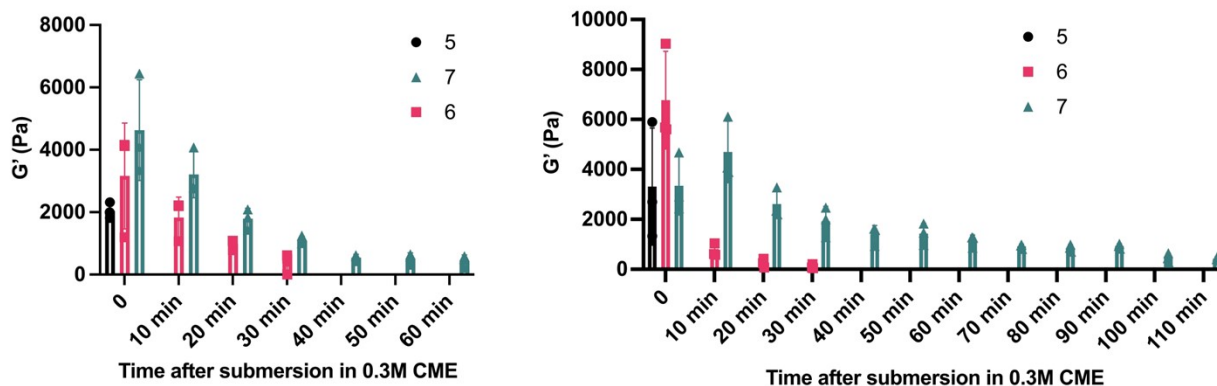

**Figure S17.** Dissolution of hydrogel formulations with crosslinkers **5**, **6**, and **7** at 10 wt% (left) and 20 wt% (right) upon submersion in 0.3M CME solution, pH 8.6.

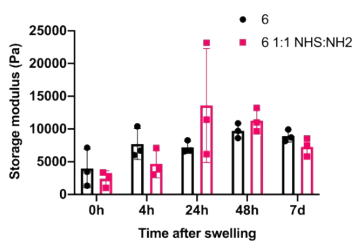

**Figure S18.** Rheological measurements on hydrogels from crosslinker **6** with 2:1 (black) or 1:1 (pink) NHS:NH<sub>2</sub> mole ratio.

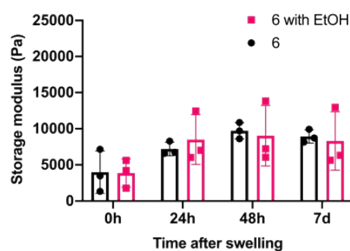

**Figure S19.** Rheological measurements of hydrogels made of crosslinker **6** with and without EtOH.

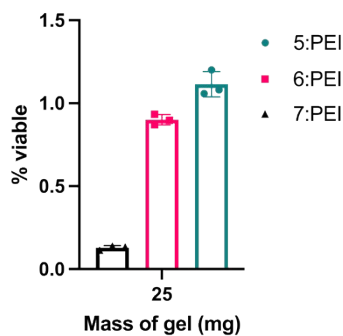

**Figure S20.** Cell viability of hydrogel formulations **5:PEI**, **6:PEI** and **7:PEI** against NIH3T3 fibroblasts. The cells were purchased from ACTT.

## V. *In vivo* porcine study

| Parameter                  | Ionic Hydrogel Dissolving (n=3) |           | Gauze Sponge (Sterile) (n=3) |           | No Material Used (n=3) |           |
|----------------------------|---------------------------------|-----------|------------------------------|-----------|------------------------|-----------|
|                            | Mean ± SD                       | Incidence | Mean ± SD                    | Incidence | Mean ± SD              | Incidence |
| Inflammation               | 1.00 ± 0.00                     | 100%      | 1.00 ± 0.00                  | 100%      | 1.33 ± 0.58            | 100%      |
|                            | 1.00                            | 100%      | 1.00                         | 100%      | 1.00                   | 100%      |
| Neutrophils                | 0.33 ± 0.58                     | 33%       | 0.00 ± 0.00                  | 0%        | 1.00 ± 1.00            | 67%       |
|                            | 0.00                            | 33%       | 0.00                         | 0%        | 1.00                   | 67%       |
| Histiocytes                | 0.00 ± 0.00                     | 0%        | 0.00 ± 0.00                  | 0%        | 0.00 ± 0.00            | 0%        |
|                            | 0.00                            | 0%        | 0.00                         | 0%        | 0.00                   | 0%        |
| Lymphocytes                | 1.00 ± 0.00                     | 100%      | 1.00 ± 0.00                  | 100%      | 1.00 ± 0.00            | 100%      |
|                            | 1.00                            | 100%      | 1.00                         | 100%      | 1.00                   | 100%      |
| Multinucleated Giant Cells | 0.00 ± 0.00                     | 0%        | 0.00 ± 0.00                  | 0%        | 0.00 ± 0.00            | 0%        |
|                            | 0.00                            | 0%        | 0.00                         | 0%        | 0.00                   | 0%        |
| Plasma Cells               | 0.00 ± 0.00                     | 0%        | 0.00 ± 0.00                  | 0%        | 0.00 ± 0.00            | 0%        |
|                            | 0.00                            | 0%        | 0.00                         | 0%        | 0.00                   | 0%        |
| Eosinophils                | 1.00 ± 0.00                     | 100%      | 1.00 ± 0.00                  | 100%      | 1.00 ± 0.00            | 100%      |
|                            | 1.00                            | 100%      | 1.00                         | 100%      | 1.00                   | 100%      |

**Table S1.** Mean ± SD, median and incidence of inflammation and inflammatory cell types. Day 3, Group 1, no dressing changes.

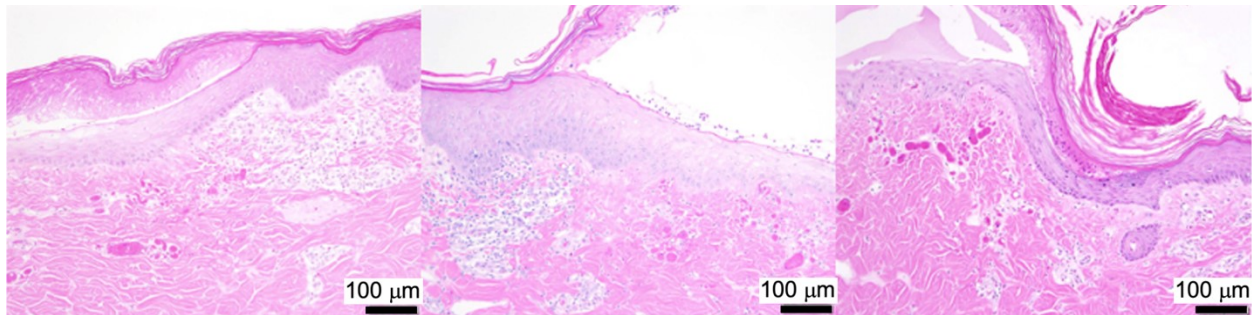

**Figure S21.** H&E of Group 1 for gauze (left), no dressing (middle), and hydrogel dressing (right).

| Parameter                  | Ionic Hydrogel Dissolving (n=3) |               | Gauze Sponge (Sterile) (n=3) |               | No Material Used (n=3) |               |
|----------------------------|---------------------------------|---------------|------------------------------|---------------|------------------------|---------------|
|                            | Mean ± SD                       | Incidence (%) | Mean ± SD                    | Incidence (%) | Mean ± SD              | Incidence (%) |
| Inflammation               | 1.33 ± 0.58                     | 100%          | 1.33 ± 0.58                  | 100%          | 1.33 ± 0.58            | 100%          |
|                            | 1.00                            | 100%          | 1.00                         | 100%          | 1.00                   | 100%          |
| Neutrophils                | 1.33 ± 0.58                     | 100%          | 1.33 ± 0.58                  | 100%          | 1.33 ± 0.58            | 100%          |
|                            | 1.00                            | 100%          | 1.00                         | 100%          | 1.00                   | 100%          |
| Histiocytes                | 1.00 ± 0.00                     | 100%          | 1.00 ± 0.00                  | 100%          | 1.00 ± 0.00            | 100%          |
|                            | 1.00                            | 100%          | 1.00                         | 100%          | 1.00                   | 100%          |
| Lymphocytes                | 1.00 ± 0.00                     | 100%          | 1.00 ± 0.00                  | 100%          | 1.00 ± 0.00            | 100%          |
|                            | 1.00                            | 100%          | 1.00                         | 100%          | 1.00                   | 100%          |
| Multinucleated Giant Cells | 0.00 ± 0.00                     | 0%            | 0.00 ± 0.00                  | 0%            | 0.00 ± 0.00            | 0%            |
|                            | 0.00                            | 0%            | 0.00                         | 0%            | 0.00                   | 0%            |
| Plasma Cells               | 0.00 ± 0.00                     | 0%            | 0.00 ± 0.00                  | 0%            | 0.00 ± 0.00            | 0%            |
|                            | 0.00                            | 0%            | 0.00                         | 0%            | 0.00                   | 0%            |
| Eosinophils                | 1.00 ± 0.00                     | 100%          | 1.00 ± 0.00                  | 100%          | 1.00 ± 0.00            | 100%          |
|                            | 1.00                            | 100%          | 1.00                         | 100%          | 1.00                   | 100%          |

**Table S2.** Mean ± SD, median and incidence of inflammation and inflammatory cell types. Day 7, Group 3, no dressing changes.



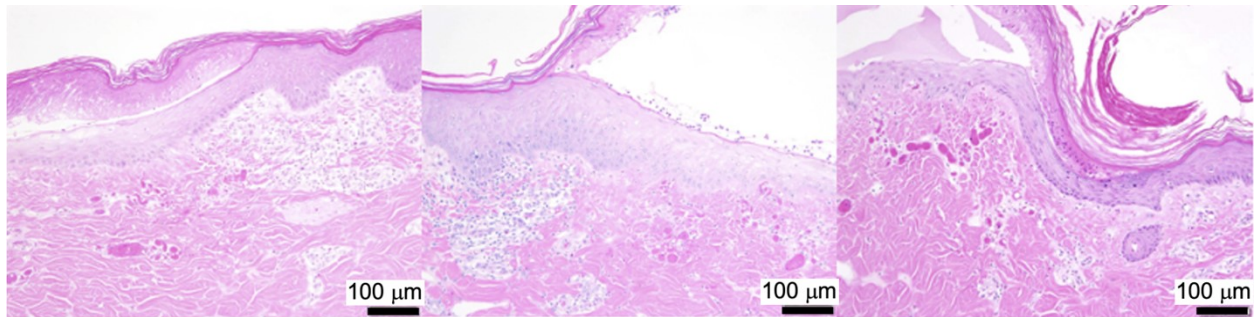

**Figure S22.** H&E of Group 1 for gauze (left), no dressing (middle), and hydrogel dressing (right).

| Parameter                  | Ionic Hydrogel Dissolving (n=3) |               | Gauze Sponge (Sterile) (n=3) |               | No Material Used (n=3) |               |
|----------------------------|---------------------------------|---------------|------------------------------|---------------|------------------------|---------------|
|                            | Mean ± SD                       | Incidence (%) | Mean ± SD                    | Incidence (%) | Mean ± SD              | Incidence (%) |
| Inflammation               | 1.67 ± 0.58                     | 100%          | 1.67 ± 0.58                  | 100%          | 2.00 ± 0.00            | 100%          |
|                            | 2.00                            | 100%          | 2.00                         | 100%          | 2.00                   | 100%          |
| Neutrophils                | 1.33 ± 0.58                     | 100%          | 1.33 ± 0.58                  | 100%          | 2.00 ± 0.00            | 100%          |
|                            | 1.00                            | 100%          | 1.00                         | 100%          | 2.00                   | 100%          |
| Histiocytes                | 1.00 ± 0.00                     | 100%          | 1.00 ± 0.00                  | 100%          | 1.00 ± 0.00            | 100%          |
|                            | 1.00                            | 100%          | 1.00                         | 100%          | 1.00                   | 100%          |
| Lymphocytes                | 1.00 ± 0.00                     | 100%          | 1.00 ± 0.00                  | 100%          | 1.00 ± 0.00            | 100%          |
|                            | 1.00                            | 100%          | 1.00                         | 100%          | 1.00                   | 100%          |
| Multinucleated Giant Cells | 0.00 ± 0.00                     | 0%            | 0.00 ± 0.00                  | 0%            | 0.00 ± 0.00            | 0%            |
|                            | 0.00                            | 0%            | 0.00                         | 0%            | 0.00                   | 0%            |
| Plasma Cells               | 0.00 ± 0.00                     | 0%            | 0.00 ± 0.00                  | 0%            | 0.00 ± 0.00            | 0%            |
|                            | 0.00                            | 0%            | 0.00                         | 0%            | 0.00                   | 0%            |
| Eosinophils                | 1.00 ± 0.00                     | 100%          | 1.00 ± 0.00                  | 100%          | 1.00 ± 0.00            | 100%          |
|                            | 1.00                            | 100%          | 1.00                         | 100%          | 1.00                   | 100%          |

**Table S3.** Mean ± SD, median and incidence of inflammation and inflammatory cell types. Day 7, Group 2, 1 dressing changes.

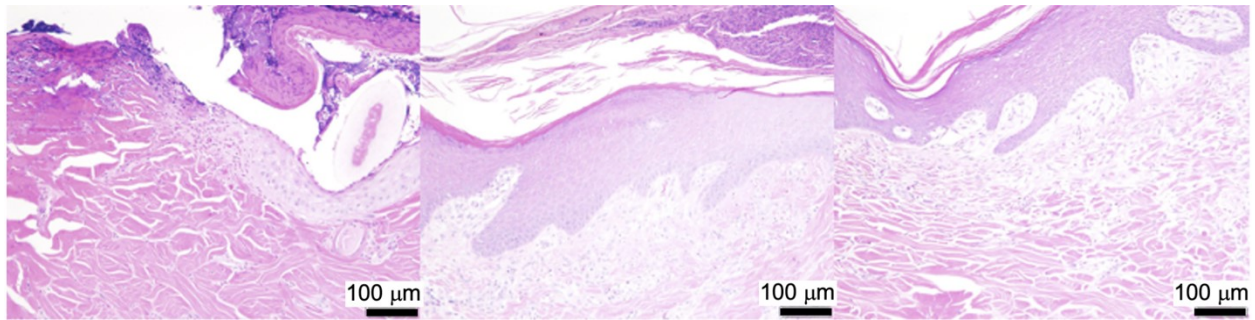

**Figure S23.** H&E of Group 2 for gauze (left), no dressing (middle), and hydrogel dressing (right).

| Parameter                  | Ionic Hydrogel Dissolving (n=3) |      | Gauze Sponge (Sterile) (n=3) |      | No Material Used (n=3) |      |
|----------------------------|---------------------------------|------|------------------------------|------|------------------------|------|
|                            | Mean ± SD                       | %    | Mean ± SD                    | %    | Mean ± SD              | %    |
| Inflammation               | 1.33 ± 0.58                     | 100% | 2.00 ± 0.00                  | 100% | 1.00 ± 0.00            | 100% |
|                            | 1.00                            | 100% | 2.00                         | 100% | 1.00                   | 100% |
| Neutrophils                | 1.33 ± 0.58                     | 100% | 2.00 ± 0.00                  | 100% | 1.00 ± 0.00            | 100% |
|                            | 1.00                            | 100% | 2.00                         | 100% | 1.00                   | 100% |
| Histiocytes                | 1.00 ± 0.00                     | 100% | 1.00 ± 0.00                  | 100% | 1.00 ± 0.00            | 100% |
|                            | 1.00                            | 100% | 1.00                         | 100% | 1.00                   | 100% |
| Lymphocytes                | 1.00 ± 0.00                     | 100% | 1.00 ± 0.00                  | 100% | 1.00 ± 0.00            | 100% |
|                            | 1.00                            | 100% | 1.00                         | 100% | 1.00                   | 100% |
| Multinucleated Giant Cells | 0.00 ± 0.00                     | 0%   | 0.00 ± 0.00                  | 0%   | 0.00 ± 0.00            | 0%   |
|                            | 0.00                            | 0%   | 0.00                         | 0%   | 0.00                   | 0%   |
| Plasma Cells               | 0.00 ± 0.00                     | 0%   | 0.00 ± 0.00                  | 0%   | 0.00 ± 0.00            | 0%   |
|                            | 0.00                            | 0%   | 0.00                         | 0%   | 0.00                   | 0%   |
| Eosinophils                | 1.00 ± 0.00                     | 100% | 1.00 ± 0.00                  | 100% | 1.00 ± 0.00            | 100% |
|                            | 1.00                            | 100% | 1.00                         | 100% | 1.00                   | 100% |

**Table S4.** Mean  $\pm$  SD, median and incidence of inflammation and inflammatory cell types. Day 14, Group 4, 1 dressing changes.

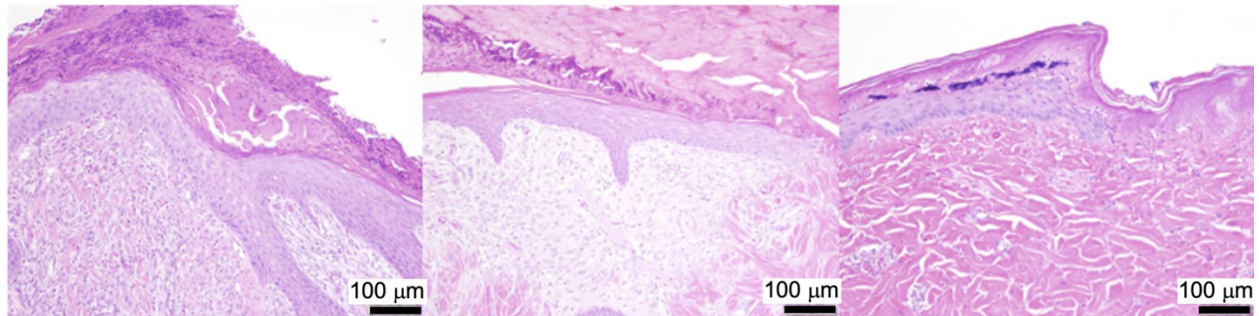

**Figure S24.** H&E of Group 4 for gauze (left), no dressing (middle), and hydrogel dressing (right).

| Parameter                  | Ionic Hydrogel Dissolving (n=3) |               | Gauze Sponge (Sterile) (n=3) |               | No Material Used (n=3) |               |
|----------------------------|---------------------------------|---------------|------------------------------|---------------|------------------------|---------------|
|                            | Mean $\pm$ SD                   | Incidence (%) | Mean $\pm$ SD                | Incidence (%) | Mean $\pm$ SD          | Incidence (%) |
| Inflammation               | 1.33 $\pm$ 0.58                 | 100%          | 2.00 $\pm$ 0.00              | 100%          | 1.00 $\pm$ 0.00        | 100%          |
|                            | 1.00                            | 100%          | 2.00                         | 100%          | 1.00                   | 100%          |
| Neutrophils                | 1.33 $\pm$ 0.58                 | 100%          | 2.00 $\pm$ 0.00              | 100%          | 1.00 $\pm$ 0.00        | 100%          |
|                            | 1.00                            | 100%          | 2.00                         | 100%          | 1.00                   | 100%          |
| Histiocytes                | 1.00 $\pm$ 0.00                 | 100%          | 1.00 $\pm$ 0.00              | 100%          | 1.00 $\pm$ 0.00        | 100%          |
|                            | 1.00                            | 100%          | 1.00                         | 100%          | 1.00                   | 100%          |
| Lymphocytes                | 1.00 $\pm$ 0.00                 | 100%          | 1.00 $\pm$ 0.00              | 100%          | 1.00 $\pm$ 0.00        | 100%          |
|                            | 1.00                            | 100%          | 1.00                         | 100%          | 1.00                   | 100%          |
| Multinucleated Giant Cells | 0.00 $\pm$ 0.00                 | 0%            | 0.00 $\pm$ 0.00              | 0%            | 0.00 $\pm$ 0.00        | 0%            |
|                            | 0.00                            | 0%            | 0.00                         | 0%            | 0.00                   | 0%            |
| Plasma Cells               | 0.00 $\pm$ 0.00                 | 0%            | 0.00 $\pm$ 0.00              | 0%            | 0.00 $\pm$ 0.00        | 0%            |
|                            | 0.00                            | 0%            | 0.00                         | 0%            | 0.00                   | 0%            |
| Eosinophils                | 1.00 $\pm$ 0.00                 | 100%          | 1.00 $\pm$ 0.00              | 100%          | 1.00 $\pm$ 0.00        | 100%          |
|                            | 1.00                            | 100%          | 1.00                         | 100%          | 1.00                   | 100%          |

**Table S5.** Mean  $\pm$  SD, median and incidence of inflammation and inflammatory cell types. Day 14, Group 4, 2 dressing changes.

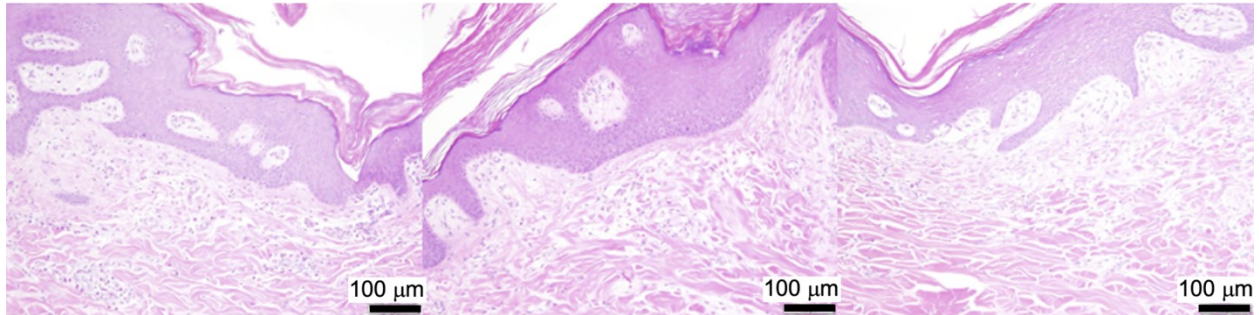

**Figure S25.** H&E of Group 5 for gauze (left), no dressing (middle), and hydrogel dressing (right).

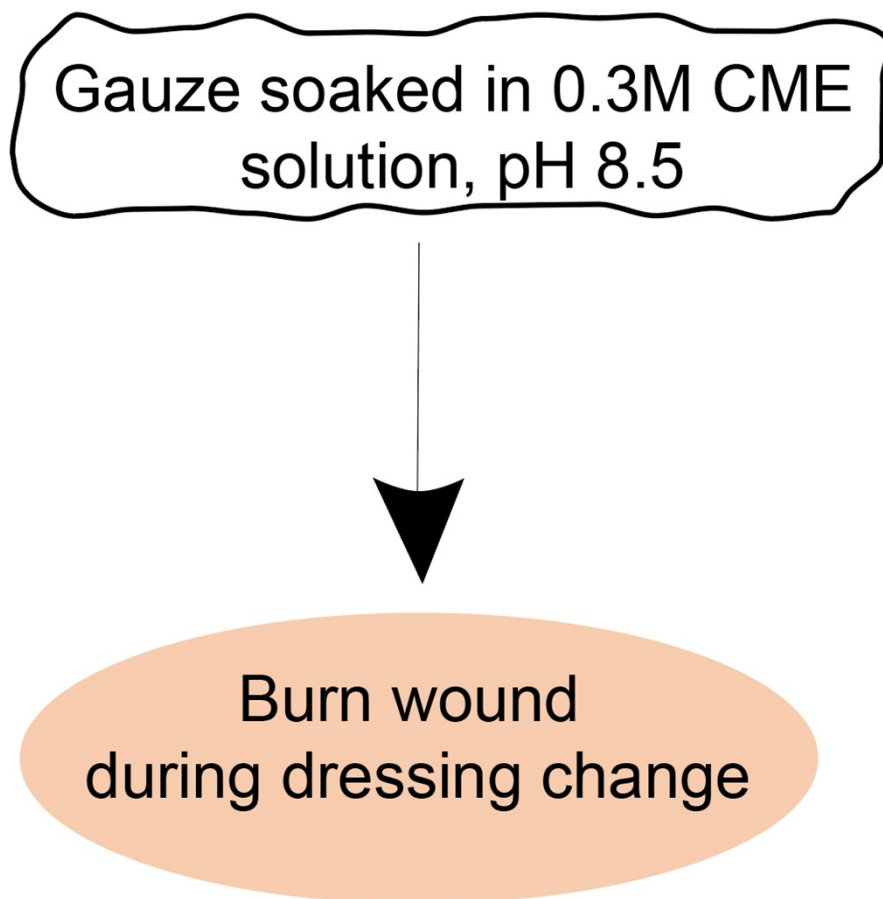

**Figure S26.** Gauze soaked in 0.3M CME solution, placed over the hydrogel **6** burn wound dressing for 10 minutes to induce dressing dissolution. Subsequently, burn wound was wiped with gauze soaked in H<sub>2</sub>O and new hydrogel dressing was prepared on top of the wound.
